# Supplementary material for: S100A1 is released from ischemic cardiomyocytes and signals myocardial damage via Toll-like receptor 4
Source: PubMed Central journal article supplement (PMC4203355; doi:10.15252/emmm.201303498), 2014-05-15
Supplement: emmm0006-0778-sd1.pdf [file emmm0006-0778-sd1.pdf]

**A**

|                          | controls            | STEMI                 |
|--------------------------|---------------------|-----------------------|
| n                        | 12                  | 12                    |
| Age [yrs]                | 60±17               | 64±13                 |
| Male gender [%]          | 58                  | 75                    |
| S100A1 [ng/mL]           | 3.0 (2.8;4.3)       | 48.4 (30.3;181.7)     |
| hsTnT [ng/L]             | 13.0 (4.7;23.1)     | 4590.0 (683.5;9774.5) |
| CK [U/L]                 | 95.5 (55.5;125.5)   | 766.0 (366.0;2449.5)  |
| LDH [U/L]                | 171.5 (148.5;223.0) | 484.0 (352.5;945.5)   |
| CAD [%]                  | 75                  | 100                   |
| PCI performed            | 0                   | 12                    |
| ASS                      | 8                   | 12                    |
| Dual platelet inhibition | 1                   | 12                    |
| Gp IIb/IIIa inhibitor    | 0                   | 4                     |
| Beta blocker             | 7                   | 9                     |
| ACE inh./AT1 antag.      | 8                   | 6                     |

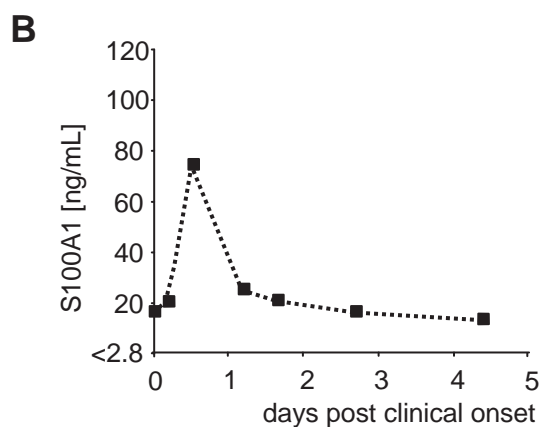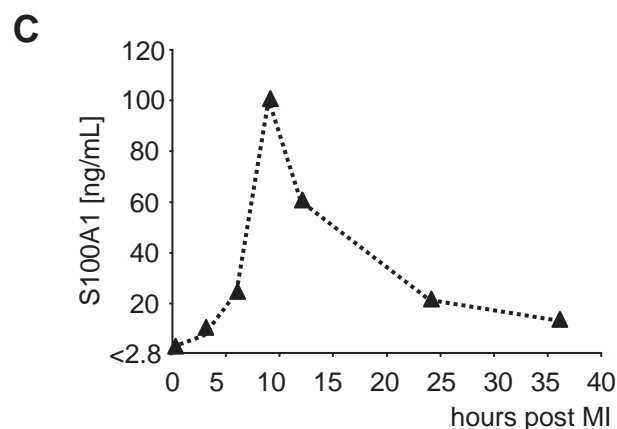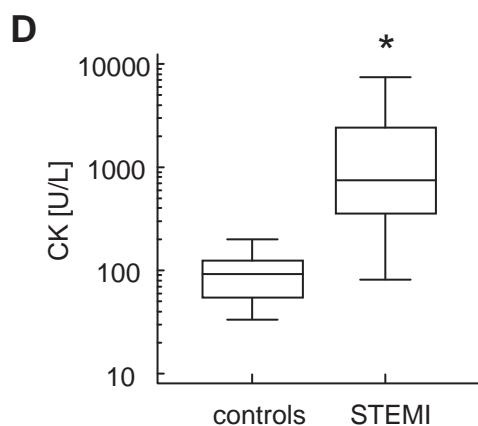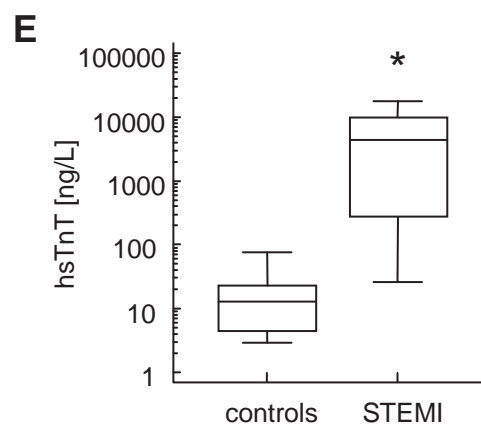

**Supplemental Figure I. Patients' characteristics, S100A1 serum course and serum levels of creatin kinase and high-sensitive troponin T.** **A**, Table with characteristics of patients presenting to the internal medicine emergency department without acute myocardial infarction (controls) and with ST-segment elevation myocardial infarction (STEMI) (LDH: lactate dehydrogenase; CAD: coronary artery disease; PCI: percutaneous coronary intervention; data displayed as median with 25th and 75th percentiles). **B**, Representative transient S100A1 serum course derived from one patient sampled by ELISA. **C**, Transient S100A1 serum course of one mouse. **D-E**, Serum levels of creatin kinase (CK) (**D**) and high-sensitive troponin T (hsTnT) (**E**) in the control and STEMI group confirmed necrosis of cardiomyocytes in STEMI patients (n=12 patients in each group, \*P=0.02 for CK, \*P=0.001 for hsTnT).
