# Supplementary material for: S100A1 is released from ischemic cardiomyocytes and signals myocardial damage via Toll-like receptor 4
Source: PubMed Central journal article supplement (PMC4203355; doi:10.15252/emmm.201303498), 2014-05-15
Supplement: emmm0006-0778-sd4.pdf [file emmm0006-0778-sd4.pdf]

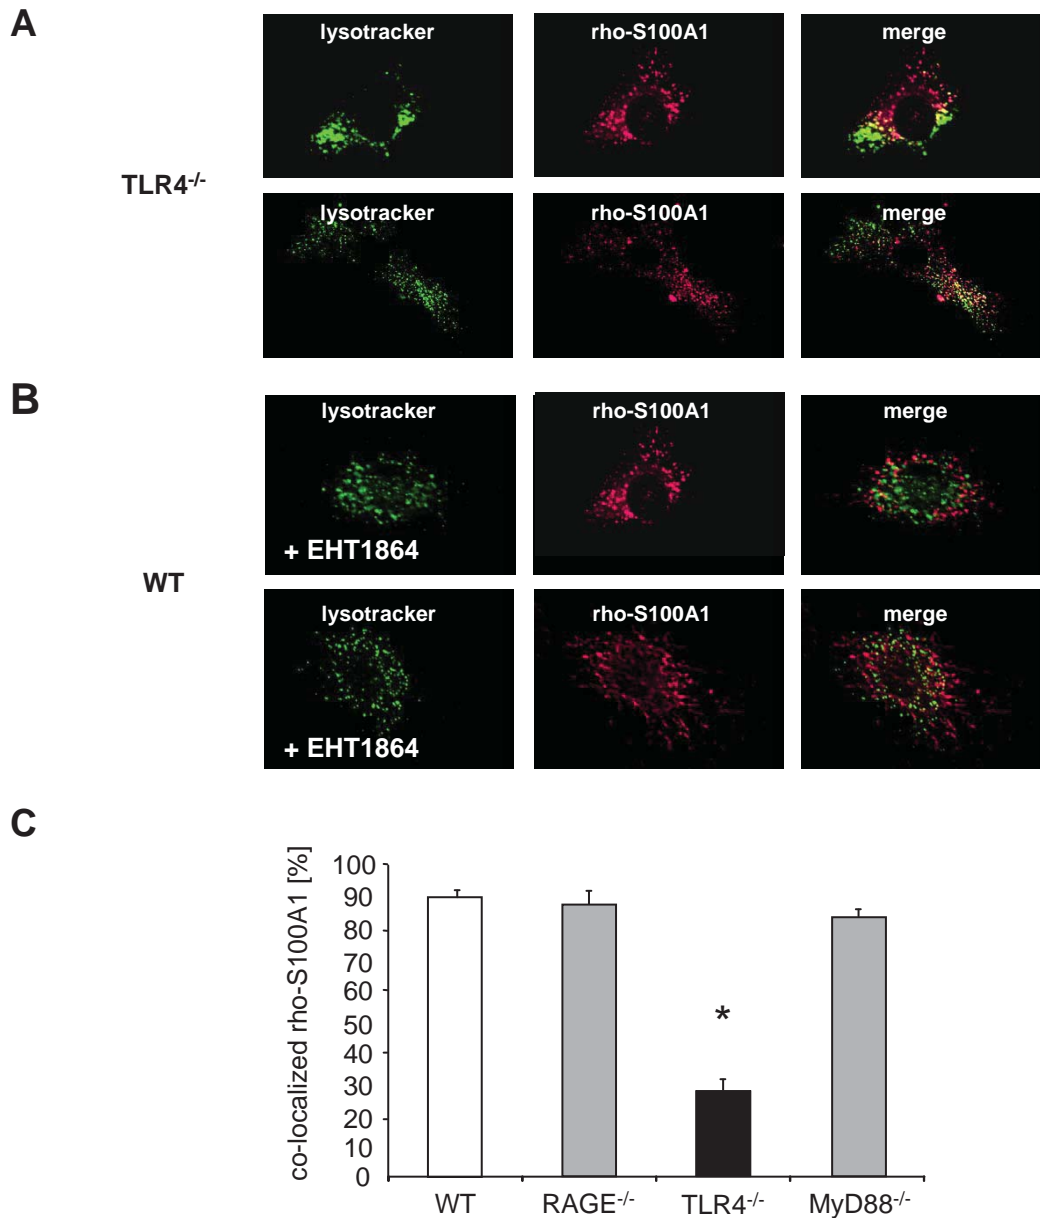

**Supplemental Figure IV. TLR4- and Rac1-dependency of S100A1 endolysosomal trafficking.**

**A**, Additional images from TLR4<sup>-/-</sup> fibroblasts; no co-localization of S100A1 with lysotracker can be observed. **B**, Pre-treatment of WT cells with Rac1-inhibitor EHT1864 mimicks the results obtained in TLR4<sup>-/-</sup> cells. **C**, Statistical analysis of rho-S100A1 and FITC-lysotracker co-localization. Data are expressed as percentage of red rho-S100A1-dots that co-localize with green lysotracker in the merged images and therefore turn yellow. Analysis was performed using a standardized protocol of ImageJ-Software (\*P=0.001, n=20 individual cells analysed in each group).
