# Supplementary material for: S100A1 is released from ischemic cardiomyocytes and signals myocardial damage via Toll-like receptor 4
Source: PubMed Central journal article supplement (PMC4203355; doi:10.15252/emmm.201303498), 2014-05-15

Source Data - Figure 5 A Part 1

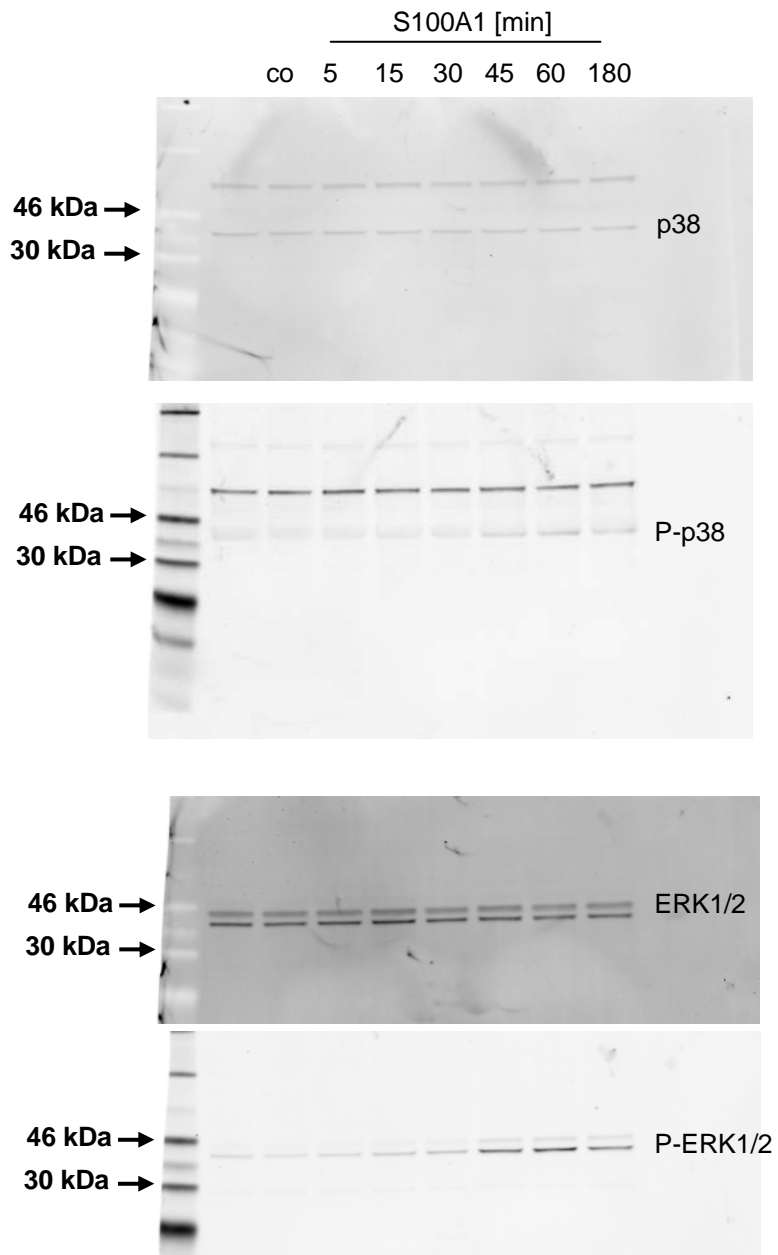

Source Data - Figure 5 A Part 2

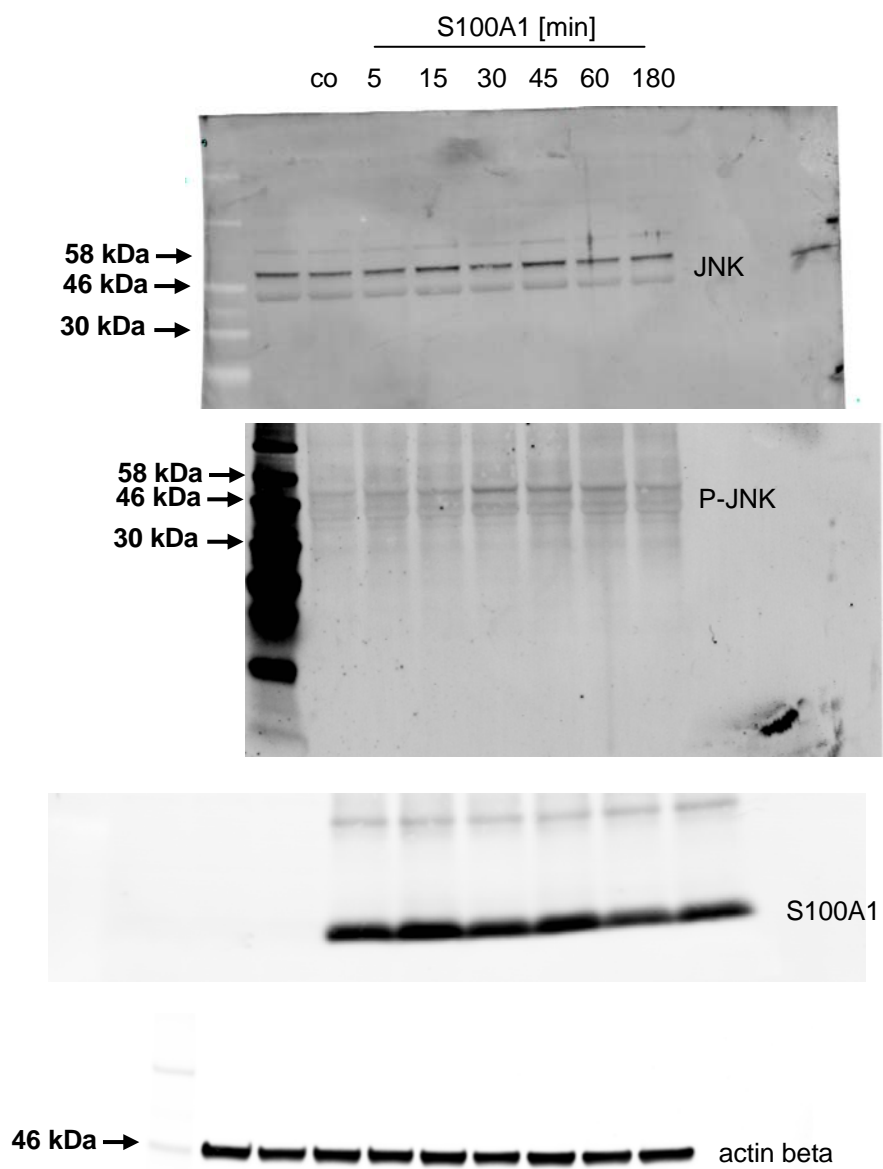

Source Data - Figure 5 B

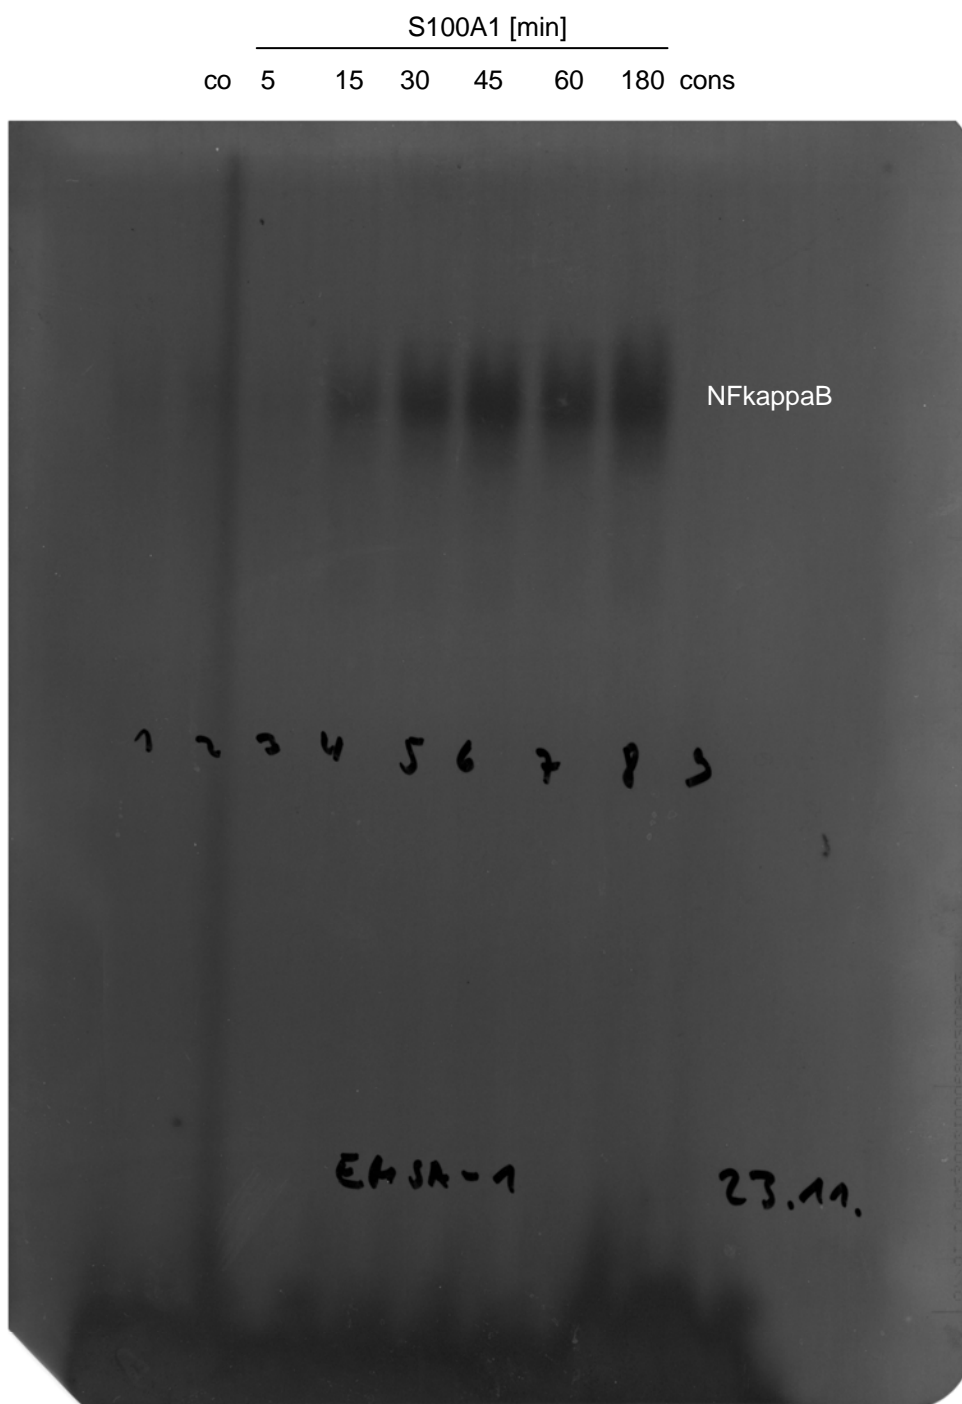

Source Data - Figure 5 C

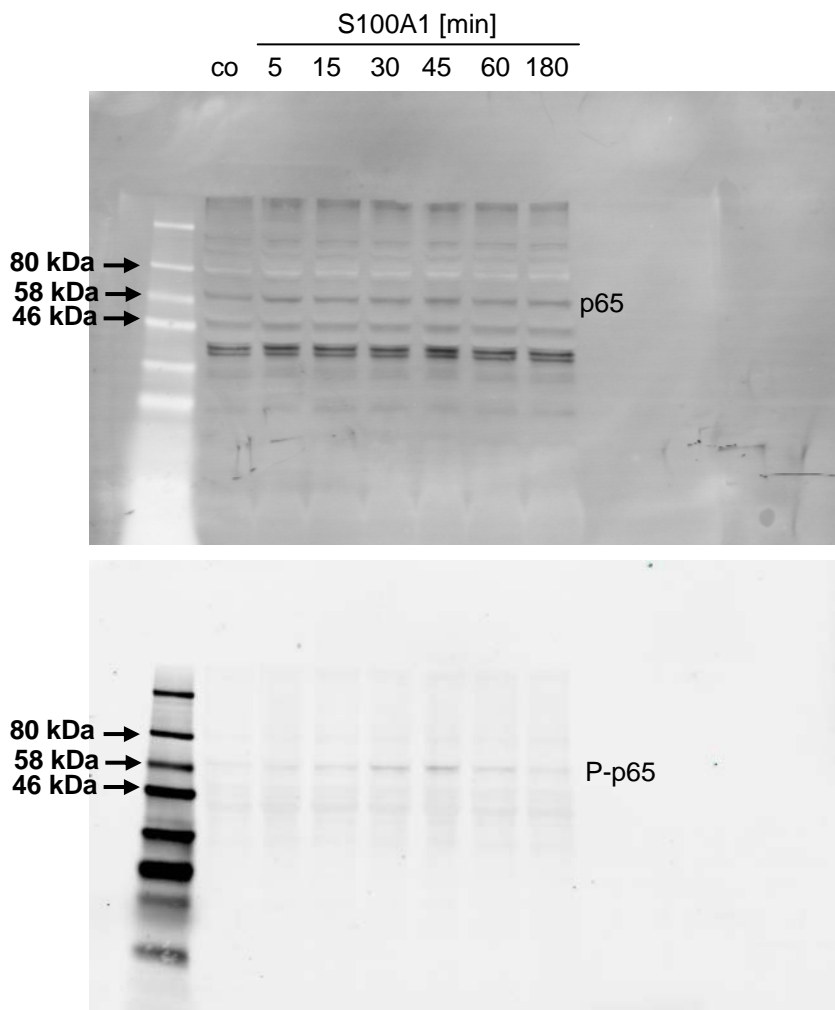

Source Data - Figure 5 E Part 1

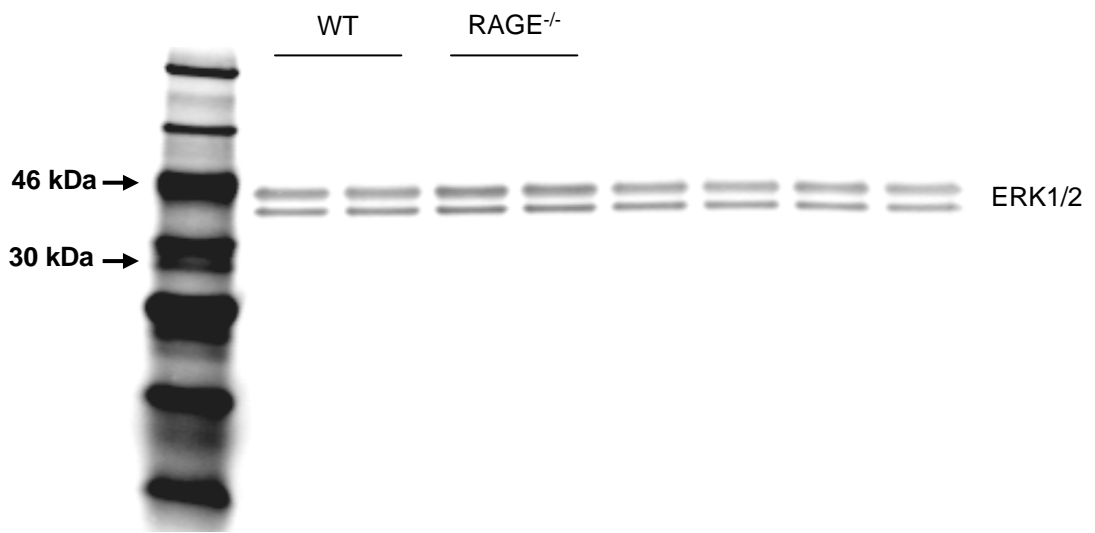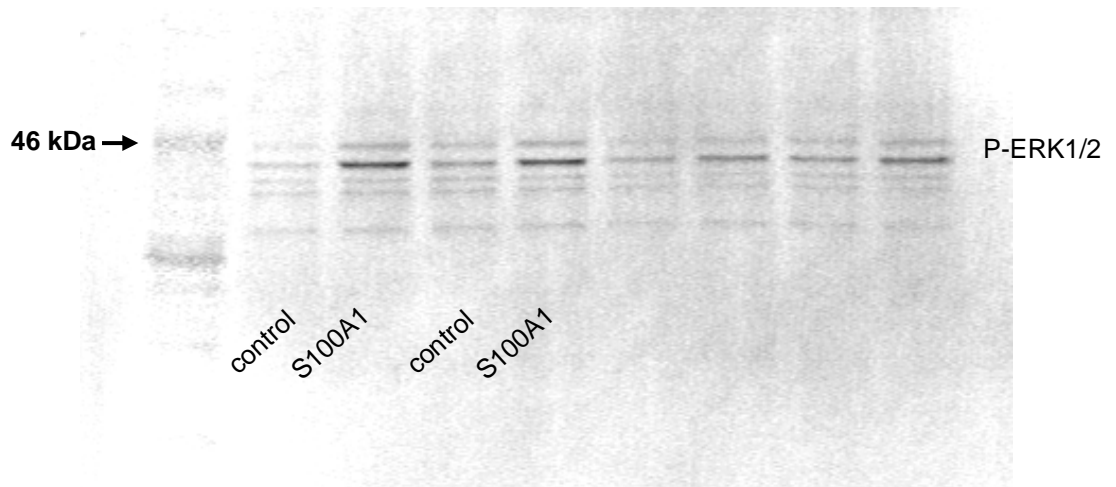

Source Data - Figure 5 E Part 2

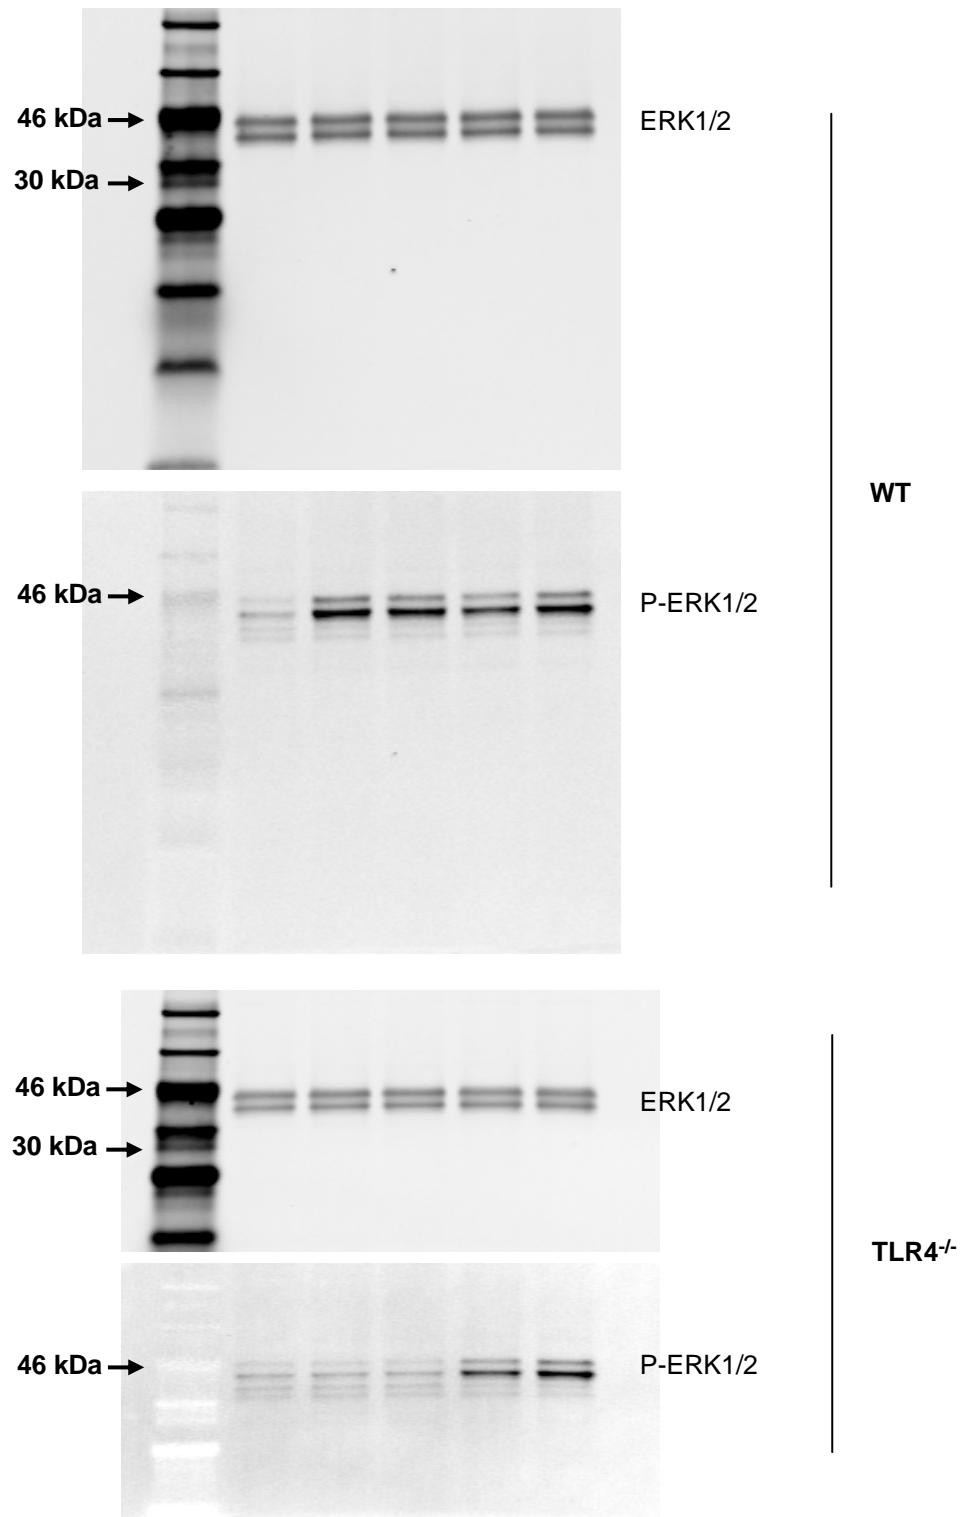

Source Data - Figure 5 E Part 3

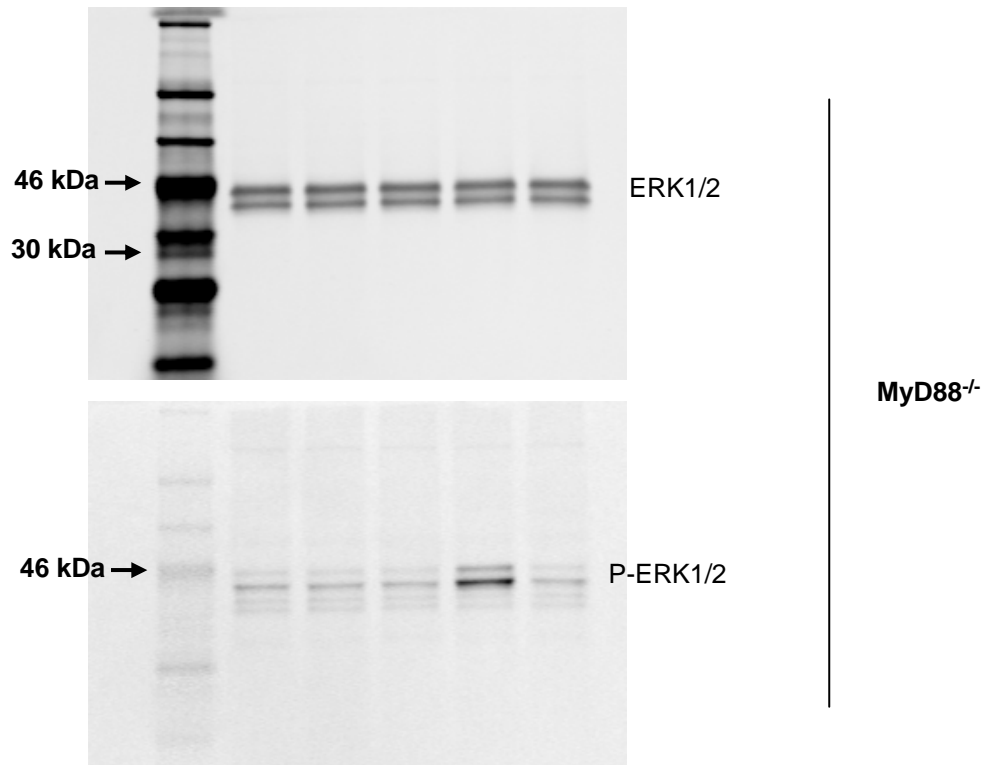

Source Data - Figure 5 F

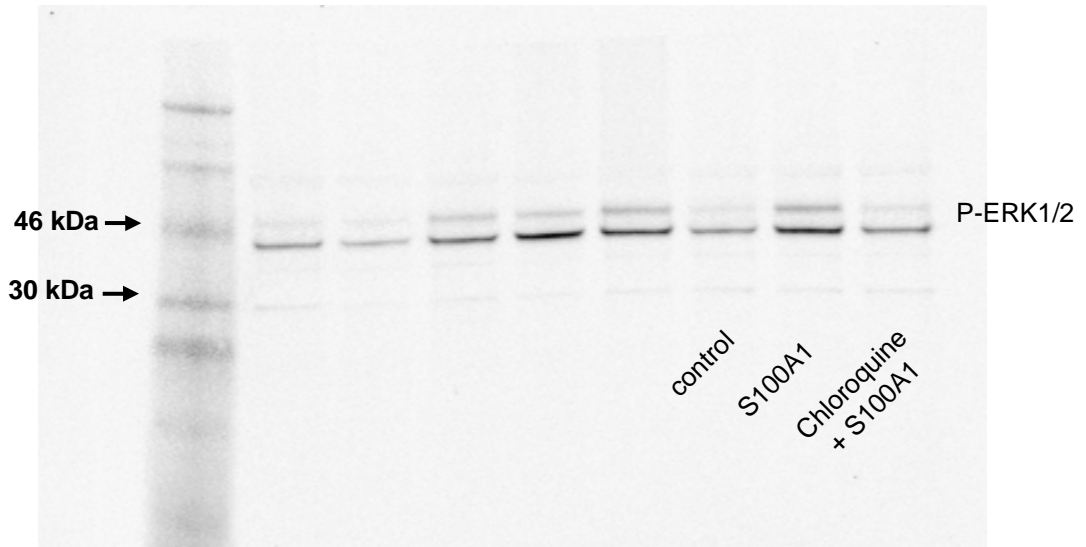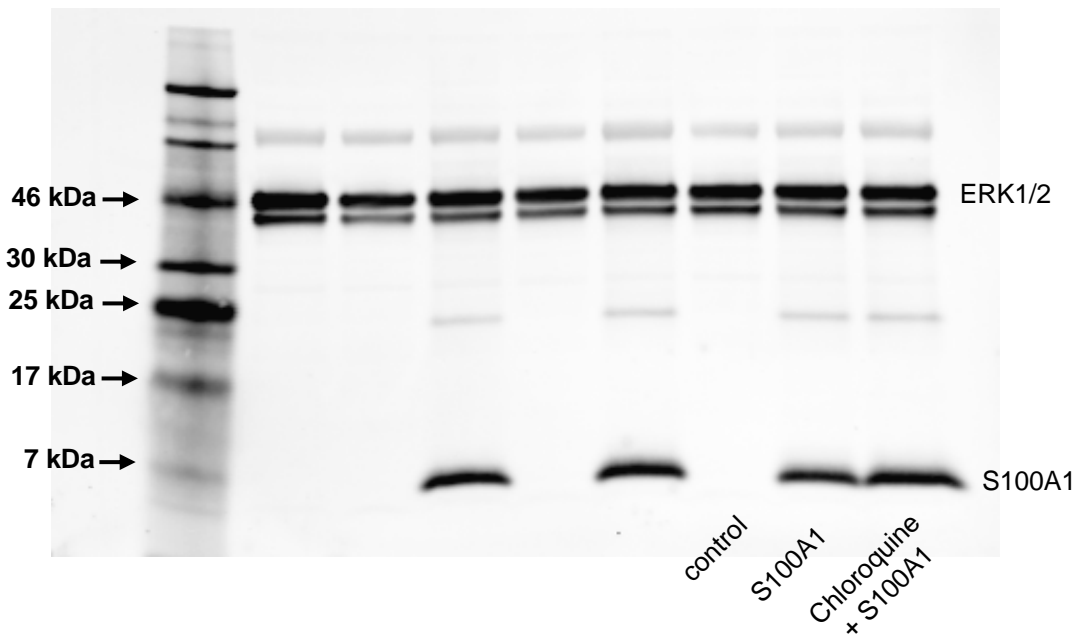

Supplement: emmm0006-0778-sd13.pdf [file emmm0006-0778-sd13.pdf]
