# Supplementary material for: S100A1 is released from ischemic cardiomyocytes and signals myocardial damage via Toll-like receptor 4
Source: PubMed Central journal article supplement (PMC4203355; doi:10.15252/emmm.201303498), 2014-05-15

Source Data - Figure 6 B

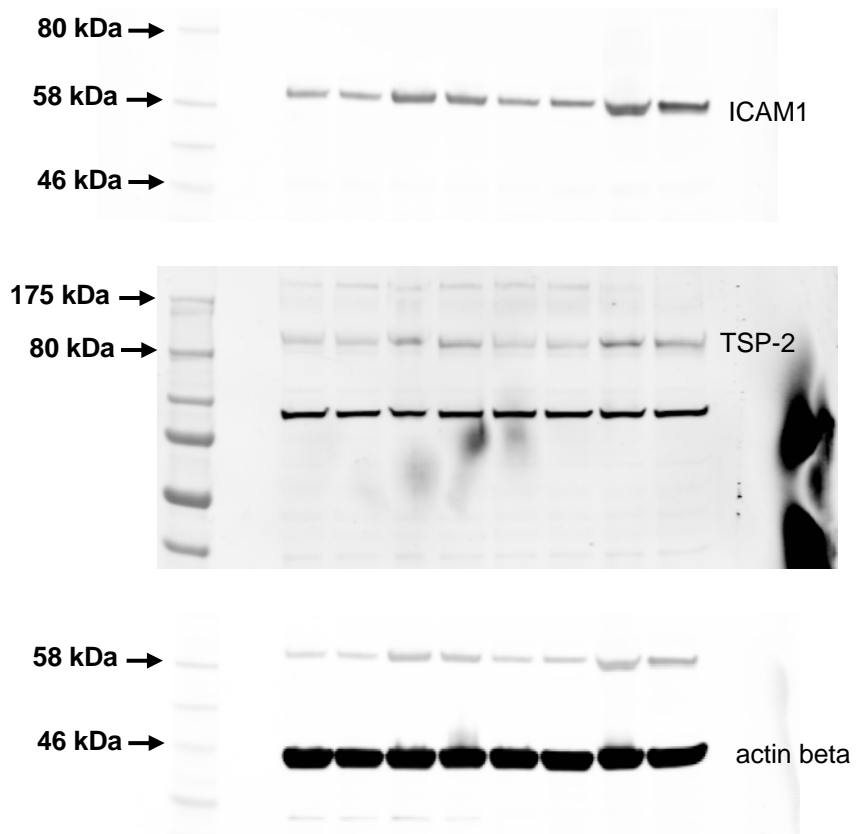

Source Data - Figure 6 F

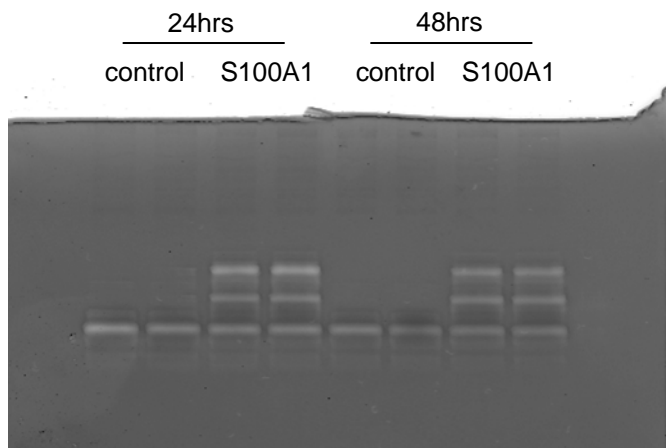

Supplement: emmm0006-0778-sd14.pdf [file emmm0006-0778-sd14.pdf]
